# Supplementary material
Source: publisher site journal article supplement (https://www.dovepress.com/article/273053)
Supplement: Supplementary file 1 [file get_supplementary_file.php]

Suppl. Table I: Selected patients with missense mutations illustrating the large biological and genetic variability in type II Glanzmann thrombasthenia

| Patient<br>(Origin/sex)                          | Bleeding Severity                                                                                                     | Residual $\alpha$ IIb $\beta$ 3<br>Fg or<br>PAC-1 binding                                                                                                       | Clot Retraction/<br>Platelet Fg/Adhesion                                       | Mutation(s)/<br>Expression studies                                                                                       | References |
|--------------------------------------------------|-----------------------------------------------------------------------------------------------------------------------|-----------------------------------------------------------------------------------------------------------------------------------------------------------------|--------------------------------------------------------------------------------|--------------------------------------------------------------------------------------------------------------------------|------------|
| <b><i>Patients with ITGA2B gene defects</i></b>  |                                                                                                                       |                                                                                                                                                                 |                                                                                |                                                                                                                          |            |
| 2 Families<br>(Germany/F:<br>Spain/F)            | Moderate. In the 2 <sup>nd</sup> family a brother died from post-traumatic hemorrhage when young                      | 1 <sup>st</sup> family: 7-12% $\alpha$ IIb $\beta$ 3 (FC) + 10-15% $\alpha$ IIb & $\beta$ 3 in WB. 2 <sup>nd</sup> family 25% $\alpha$ IIb $\beta$ 3 in FC & WB | Partial clot retraction. No platelet Fg (2 <sup>nd</sup> family)               | Homozygous p.R327H<br>Expressed in COS-7 and CHO cells                                                                   | 27, 28     |
| 1 Case<br>(USA/M)                                | Severe with GI bleeding/multiple transfusions. Destructive changes in ankle joints                                    | Around 5% $\alpha$ IIb $\beta$ 3 (FC). 25% $\alpha$ IIb and 35% $\beta$ 3 (WB). No PAC-1 binding                                                                | Clot retraction not reported. 5% platelet Fg. No platelet adhesion on Fg       | Homozygous p.L183P<br>Expressed in CHO cells                                                                             | 29         |
| Four Families<br>(Japan/F)                       | Moderate or not reported                                                                                              | 14-22% $\alpha$ IIb $\beta$ 3 (FC) – homozygote (3 cases)<br>4-8% $\alpha$ IIb $\beta$ 3 compound heterozygote (1 case)                                         | Near normal clot retraction. 50% platelet adhesion on Fg (homozygous patients) | Homozygous p.Q747P<br>Compound heterozygous p.Q747P + exon 18 skipping<br>Q747P expressed in CHO cells                   | 30,31      |
| 1 Case<br>(Spain/F)                              | Bleeding but severity not detailed                                                                                    | 10% $\alpha$ IIb & $\beta$ 3 (FC and WB).                                                                                                                       | Clot retraction very reduced and 25% platelet Fg                               | Compound heterozygous p. C674R + IVS5(+2)C>A<br>C674R expressed in CHO cells;                                            | 32, 33     |
| 3Families<br>(USA/F+M;<br>Dutch/M;<br>Chinese/M) | Mostly severe with transfusions (GI bleeding + hematuria for 1 case). Mild bleeding in 1 male in the Mennonite family | Homozygous: 10%-30% FC & WB,<br>PAC-1 failed to bind.<br>Heterozygous: 5% or lower FC but distinct bands in WB.                                                 | Clot retraction not reported. Platelet Fg much reduced (1 case).               | Homozygous p.P145L<br>Heterozygous p.P145L with IVS15(-1)Gdel or not detected.<br>P145L expressed in COS-1 and CHO cells | 34         |
| Osaka-12<br>(Japan/F)                            | Moderate                                                                                                              | 36%-41% $\alpha$ IIb & $\beta$ 3 but 13% $\alpha$ IIb $\beta$ 3 (FC). No Fg or PAC-1 binding                                                                    | Subnormal clot retraction. Some binding of 293 cells to immobilized Fg         | Heterozygous p.R143H + null allele.<br>Expression in 293 cells                                                           | 52         |
| 1 Case<br>(Afghanistan /F)                       | Severe                                                                                                                | 24% $\alpha$ IIb $\beta$ 3 (FC & CIE). No Fg or PAC-1 binding                                                                                                   | Clot retraction 10%. No platelet Fg. Much reduced platelet adhesion on Fg      | Homozygous p.T176I<br>Expressed in Cos-7 cells                                                                           | 44         |
| 1 Case<br>(China/F)                              | Moderate                                                                                                              | Residual $\alpha$ IIb $\beta$ 3 (<10%) by FC & WB that bound                                                                                                    | Clot retraction not reported. Platelet Fg content normal.                      | Heterozygous p.R553* + p.P912L<br>Expressed in CHO cells                                                                 | 37         |

Fg on platelet activation

***Patients with ITGB3 gene defects***

|                            |                                         |                                                                                                         |                                                                                             |                                                                                            |       |
|----------------------------|-----------------------------------------|---------------------------------------------------------------------------------------------------------|---------------------------------------------------------------------------------------------|--------------------------------------------------------------------------------------------|-------|
| 1 Case (China/F)           | Severe + platelet transfusion           | 6%-14% $\alpha$ IIb $\beta$ 3 (FC).<br>10% -35% $\alpha$ IIb & $\beta$ 3 (WB)                           | No clot retraction, 36% platelet Fg. Transfected cells adhered to Fg                        | Homozygous p.C374Y<br>Expressed in CHO cells                                               | 40    |
| 1 Case (Caucasian/M)       | Lifelong bleeding                       | Up to 30 % $\alpha$ IIb & $\beta$ 3 (FC & WB); <5% with MoAb to $\alpha$ IIb $\beta$ 3 (FC).            | Clot retraction normal.                                                                     | Homozygous p.S162L<br>Expressed in Cos-7 cells                                             | 51    |
| 3 Families (Japan/2M + 1F) | All with lifelong bleeding              | 19,9%, 7.5% and 15.4% $\alpha$ IIb $\beta$ 3 respectively (FC)                                          | Clot retraction normal                                                                      | Homozygous H280P<br>Heterozygous H280P with G579S or C460F<br>Expressed in CHO cells       | 41    |
| 1 Case (USA/F)             | Mild/moderate bleeding. Mother with VWD | Residual $\alpha$ IIb $\beta$ 3 but no Fg binding (FC);<br>10% $\alpha$ IIb & $\beta$ 3 (WB).           | Clot retraction normal but transfected cells failed to adhere to Fg                         | Heterozygous p.L262P + c.867 to 868del + fs + stop<br>Expression in COS-7 and HEK293 cells | 42    |
| 2 Families (France F/M)    | Mild/moderate                           | 15% and 8% $\alpha$ IIb $\beta$ 3, No Fg or PAC-1 binding. $\alpha$ v $\beta$ 3 also affected.          | Clot retraction normal. 50% or more platelet Fg. Normal adhesion of transfected cells to Fg | Homozygous p.L196P (p.L222P)<br>Heterozygous L196P + p.C598Y<br>Expressed in CHO cells     | 17,45 |
| 1 Case (India/M)           | Moderate bleeding                       | Trace $\alpha$ IIb $\beta$ 3 with complex-dependent MoAbs (FC). 10%-30% $\alpha$ IIb and $\beta$ 3 (WB) | Clot retraction not reported. <20% platelet Fg                                              | Homozygous p.C506Y<br>$\beta$ 3 migrated as a dimer                                        | 43    |

F, female ; M, male; Fg, fibrinogen; FC, flow cytometry; WB, western blot; CIE, crossed immunoelectrophoresis; GI, gastro-intestinal; VWD, von Willebrand disease. Each of the above patients has featured in a full case report
